# Supplementary material for: Simultaneous electrochemical determination of 4-aminophenazone and caffeine at electrochemically pre-treated graphite pencil electrode
Source: Royal Society of Chemistry journal article supplement (doi:10.1039/c4ay00467a), 2014-01-01

Supplementary figure S1,  
CV and DPV of 4-AP

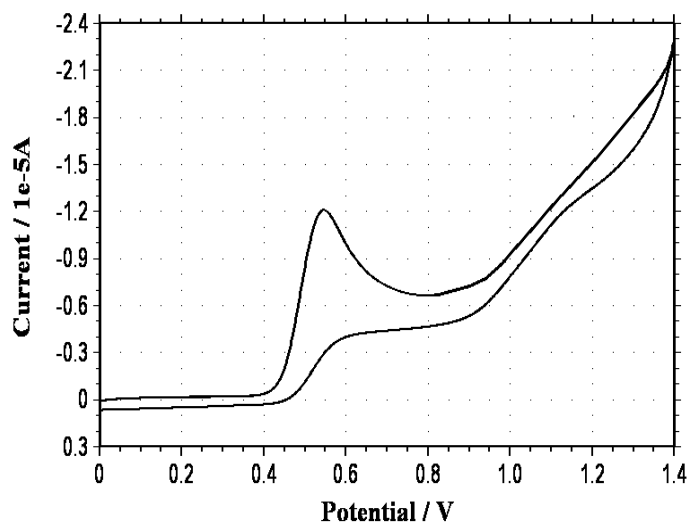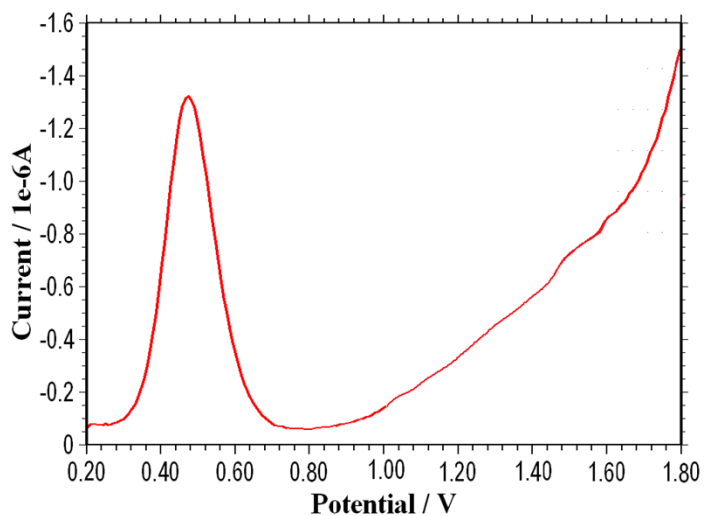

CV and DPV of CAF

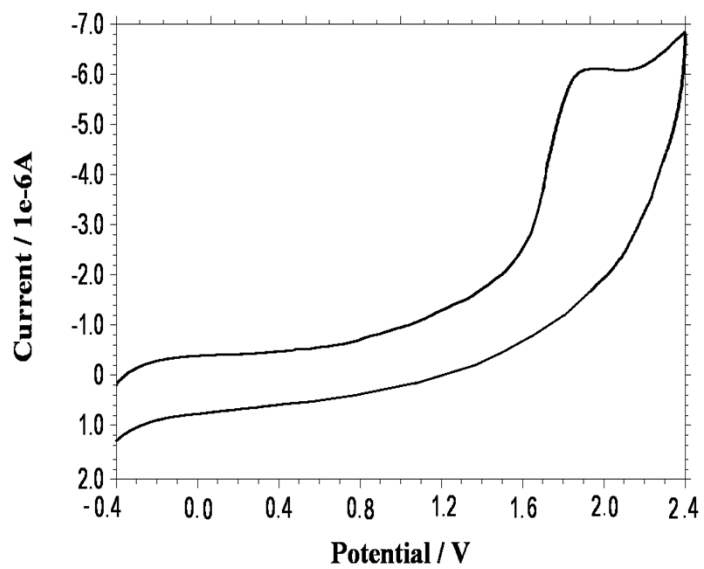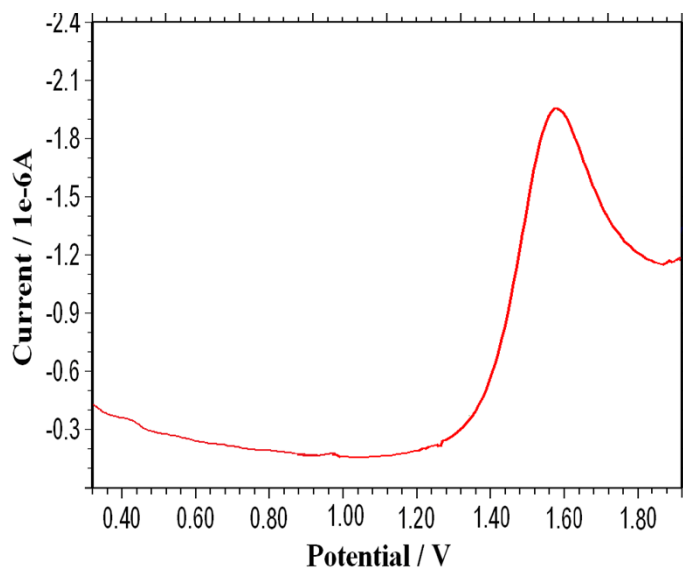

Supplementary Figure S2

UV-visible spectra of electrolyzed solution, (a) before the electrolysis, (b) after the electrolysis

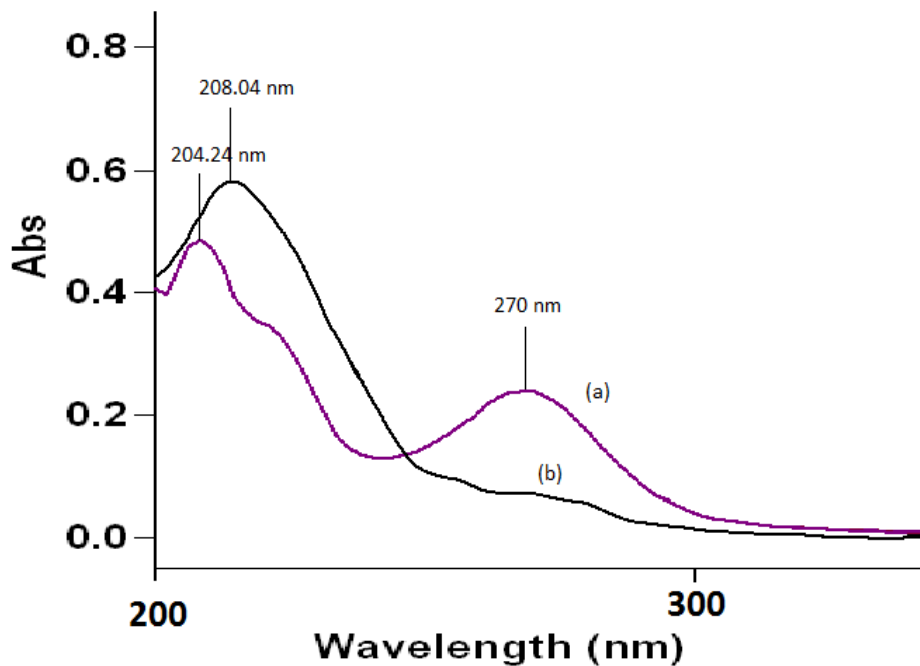

Supplementary Figure S3

LC-MS spectra of electrolyzed solution

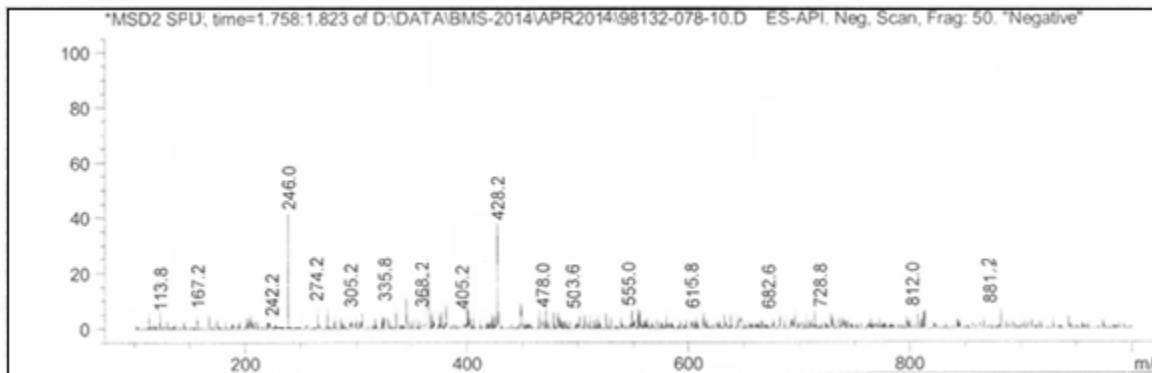

### Supplementary Figure S4

Possible interference of some drugs and biological samples with the voltammetric signal of mixture of 4-AP and CAF.

#### Interference with some drugs

##### With Aspirin

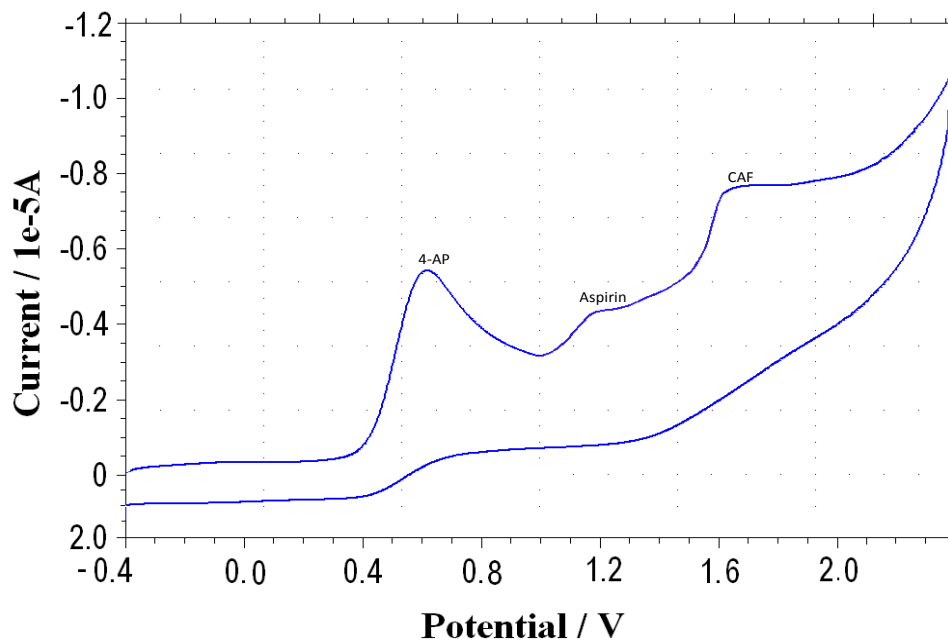

##### With Paracetamol

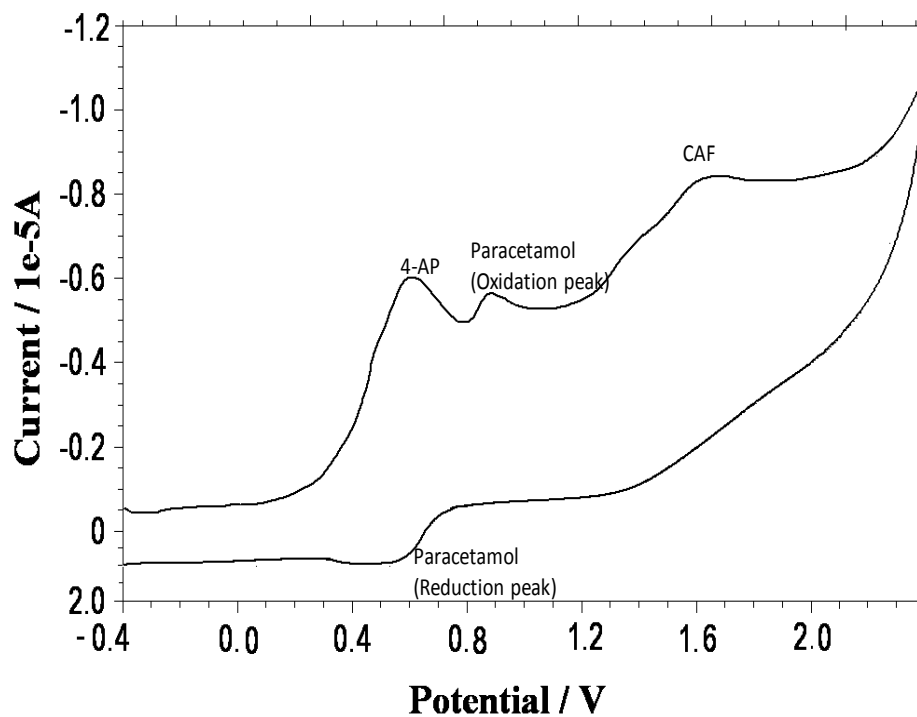

**With Ascorbic acid**

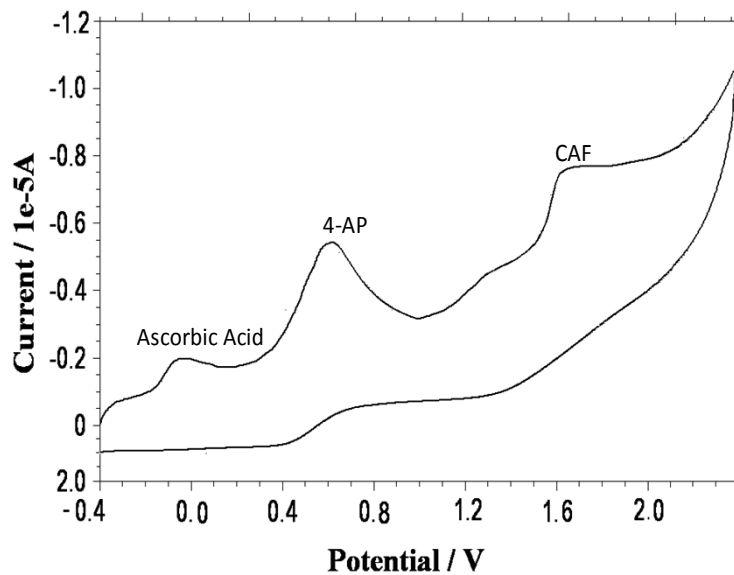

**Interference study with some biological species.**

**With BSA, (a) Only Drugs (b) Drugs+100  $\mu$ M BSA**

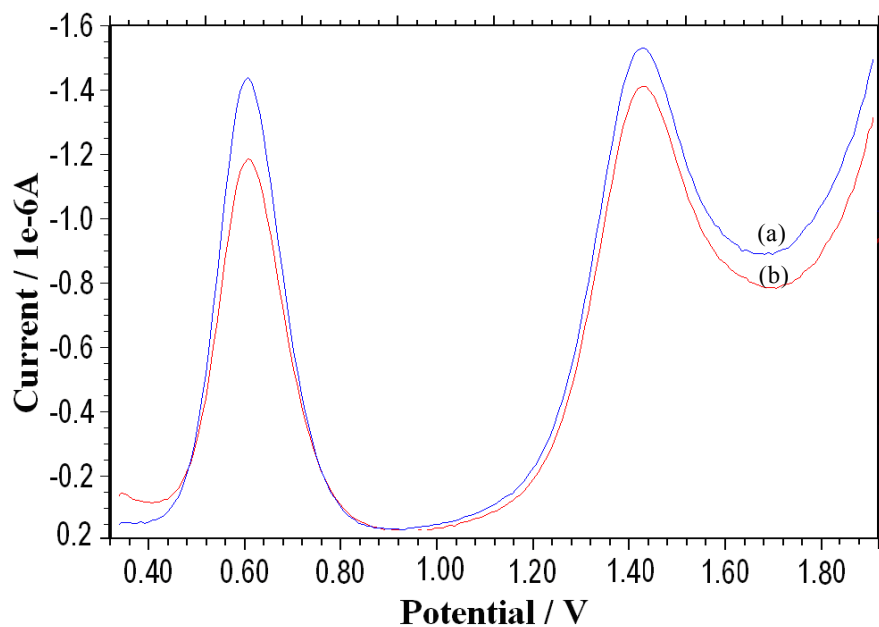

With DNA, (a) Only Drugs (b) Drugs+100  $\mu$ M DNA

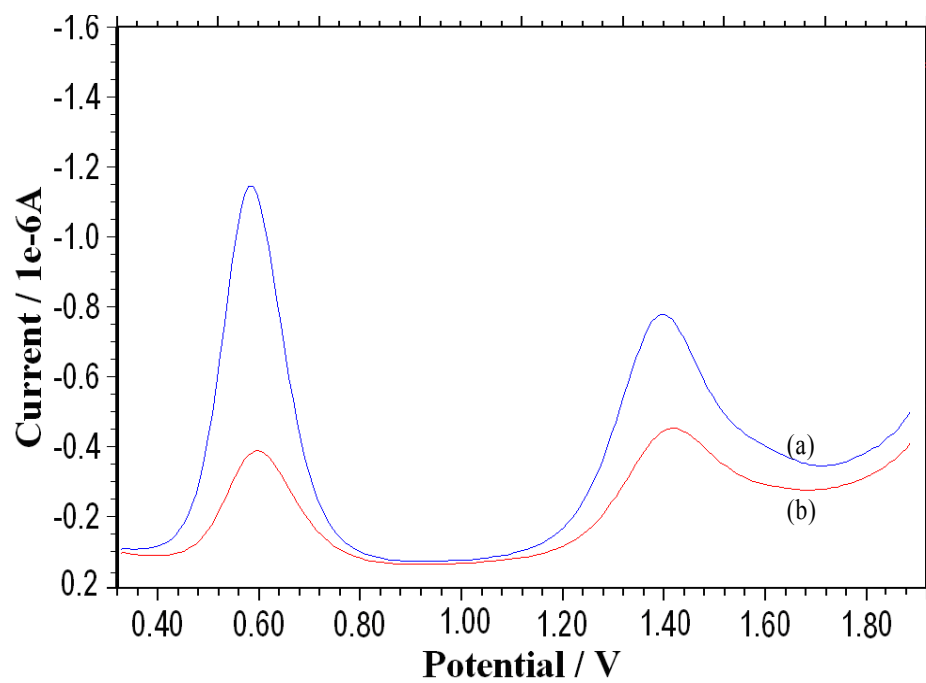

Supplement: c4ay00467a1.pdf [file c4ay00467a1.pdf]
